# Supplementary material for: Debenzylation of Benzyl-Protected Methylcellulose
Source: MDPI journal article supplement (doi:10.3390/polysaccharides3030028), 2022-06-22
Supplement: s1 [file s1]

Archive with 1 entries (1 files):
- polysaccharides-1689413-supplementary.pdf
